# Supplementary material for: Enhanced gas-sensing response by gamma ray irradiation: Ag/Ag2SnO3nanoparticle-based sensor to ethanol, nitromethane and acetic acid
Source: Royal Society of Chemistry journal article supplement (doi:10.1039/c4tc01604a), 2014-10-10
Supplement: c4tc01604a1.pdf [file c4tc01604a1.pdf]

## Electronic Supplementary Information

### Enhanced gas-sensing response by gamma ray irradiation: Ag/Ag<sub>2</sub>SnO<sub>3</sub> nanoparticle-based sensor to ethanol, nitromethane and acetic acid†

Kui Yin,<sup>a</sup> Fan Liao,<sup>a</sup> Yan Zhu,<sup>a</sup> Aimin Gao,<sup>b,\*</sup> Tao Wang,<sup>a</sup> Mingwang Shao<sup>a,\*</sup>

<sup>a</sup>Institute of Functional Nano & Soft Materials (FUNSOM), Jiangsu Key Laboratory for Carbon-based Functional Materials and Devices & Collaborative Innovation Center of Suzhou Nano Science and Technology, Soochow University, Suzhou 215123, P. R. China

<sup>b</sup>Radiation Technology Research Institute, Suzhou CNNC Huadong Radiation Co., Ltd, Soochow University, Suzhou, Jiangsu 215123, P. R. China

#### 1. Hydrothermal Process to Na<sub>2</sub>Sn(OH)<sub>6</sub>.

To obtain Ag<sub>2</sub>SnO<sub>3</sub>, Na<sub>2</sub>Sn(OH)<sub>6</sub> needed to be synthesized firstly. In a typical procedure, 0.263 g SnCl<sub>4</sub> and 0.375 g PVP were simultaneously dissolved in 50 mL ethanol/water (4:1, by V/V) solution. Then 10 mL NaOH (12.5 M) aqueous solution was added dropwise under vigorous stirring. The resulting slurry was transferred into a Teflon-lined stainless steel autoclave with a capacity of 100 mL. The hydrothermal synthesis was performed at 180 °C for 24 h; then the vessel was cooled to room temperature. The resultant Na<sub>2</sub>Sn(OH)<sub>6</sub> was cleaned by ethanol and collected by centrifugation.<sup>S1,S2</sup>

#### 2. The synthesis of Ag<sub>2</sub>SnO<sub>3</sub>.

Herein, the two-step process plays an important role in the synthesis of Ag<sub>2</sub>SnO<sub>3</sub>, which is based on the following reactions.

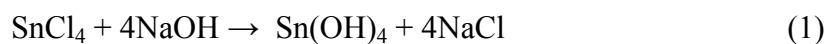

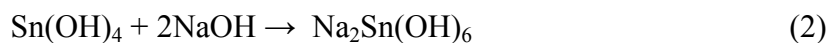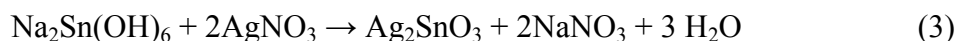

A hydrothermal reaction was carried out in an ethanol/water solution to obtain crystalline  $\text{Na}_2\text{Sn(OH)}_6$ . The following reaction with the  $\text{AgNO}_3$  aqueous solution resulted in a brown powdery product that can be confirmed as  $\text{Ag}_2\text{SnO}_3$  by the XRD pattern. The reaction is basically a diffusion-controlled ion-exchange process in which  $\text{Ag}^+$  ions in the  $\text{AgNO}_3$  aqueous solution replace the  $\text{Na}^+$  of  $\text{Na}_2\text{Sn(OH)}_6$  as the reaction proceeds, driven by the ion concentration gradient. The ion-exchange reaction was completed within 50 min, and then the resultant  $\text{Ag}_2\text{SnO}_3$  was filtered, washed with ethanol, and dried at 60 °C.

### 3. The XRD pattern and SEM image of $\text{Ag}_2\text{SnO}_3$ .

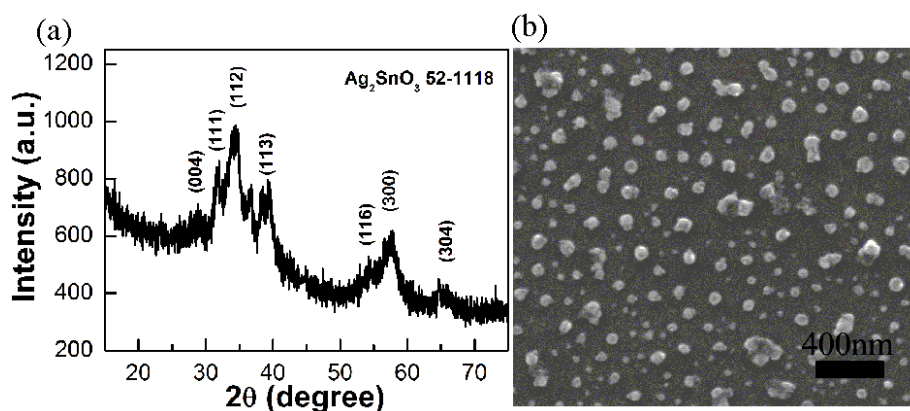

**Fig. S1** XRD pattern and SEM image of  $\text{Ag}_2\text{SnO}_3$  nanoparticles.

Fig. S1a shows the XRD pattern of  $\text{Ag}_2\text{SnO}_3$ , which is in accordance with the standard data (JCPDS. No 52-1118). From the XRD pattern, it could be found that the crystallinity of  $\text{Ag}_2\text{SnO}_3$  is not good.

Scanning electron microscopy (SEM) images were taken on a FEI-quanta 200 scanning electron microscope with accelerating voltage of 30 kV. The SEM image (Fig. S1b) shows that  $\text{Ag}_2\text{SnO}_3$  is agglomerated each other with the average diameter of 100 nm.

#### 4. The gas sensitivity of $\text{Ag}/\text{Ag}_2\text{SnO}_3$ to $\text{CH}_3\text{NO}_2$ .

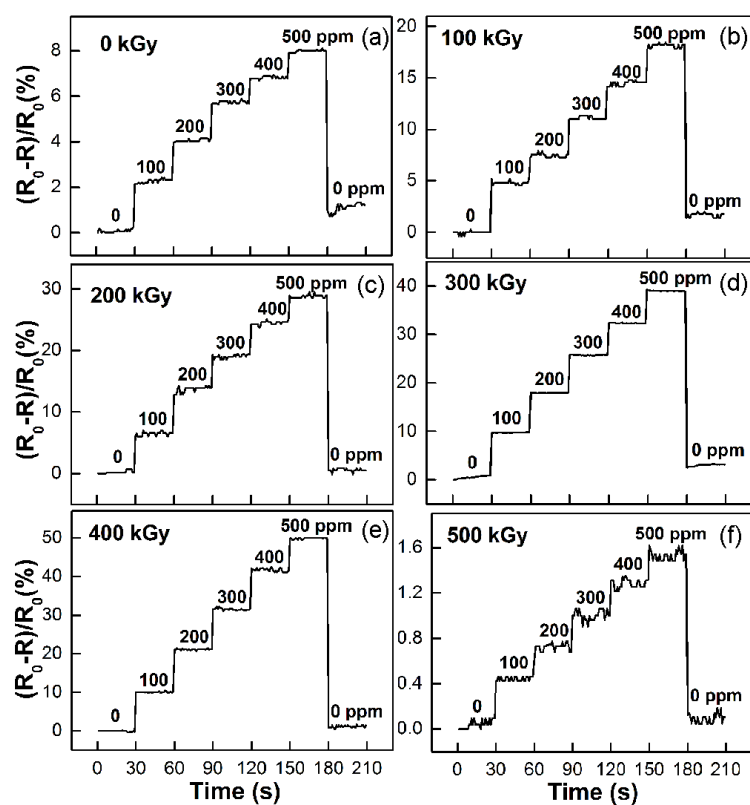

**Fig. S2** Response of six different gamma ray dose irradiated sensors upon exposure to various concentrations of  $\text{CH}_3\text{NO}_2$ .

## 5. Gas responses of six irradiated products to $\text{CH}_3\text{NO}_2$ .

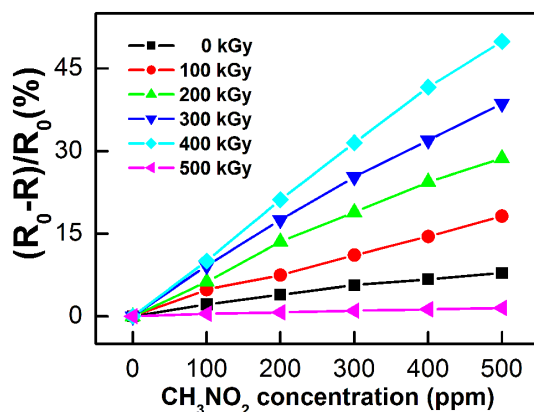

**Fig. S3** The relationship between gas responses of six irradiated products and concentration of  $\text{CH}_3\text{NO}_2$ .

## 6. The gas sensitivity of $\text{Ag}/\text{Ag}_2\text{SnO}_3$ to $\text{CH}_3\text{COOH}$ .

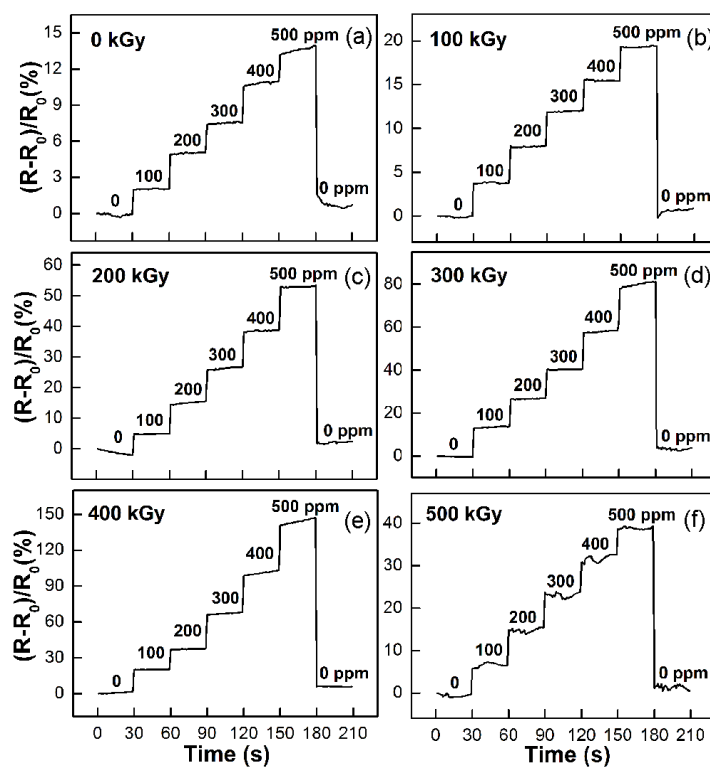

**Fig. S4** Response of six different gamma ray dose irradiated sensors upon exposure to various concentrations of  $\text{CH}_3\text{COOH}$ .

## 7. The Brunauer-Emmett-Teller (BET) specific surface area of the irradiated products

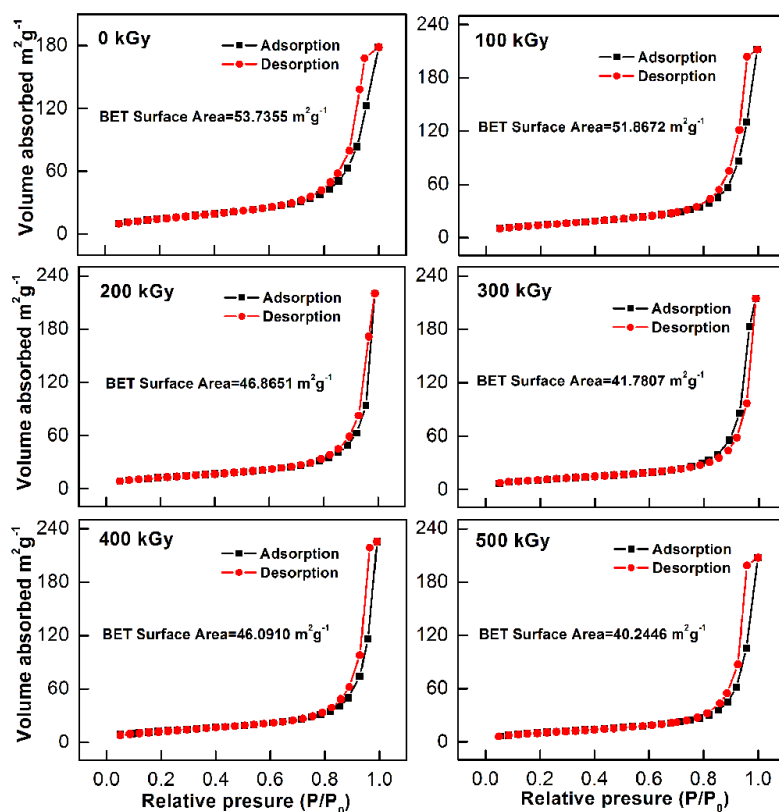

Fig. S5 The BET specific surface area of the products with different irradiation doses.

S1 Y. W. Tang, Y. Jiang, Z. Y. Jia, B. H. Li, L. J. Luo and L. Xu, *Inorg. Chem.*, 2006, **26**, 10774.

S2 K. Yin, M. W. Shao, Z. S. Zhang and Z. Q. Lin, *Mater. Resear. Bull.*, 2012, **47**, 3704.
